# Supplementary material for: Diet in Early Life Is Related to Child Mental Health and Personality at 8 Years: Findings from the Norwegian Mother, Father and Child Cohort Study (MoBa)
Source: MDPI journal article supplement (doi:10.3390/nu15010243), 2023-01-03
Supplement: s1 [file s1]

**Table S1:** Overview of the diet scores and the corresponding subscales assessing adherence to a potentially healthy and sustainable diet (NND) during pregnancy and child age 6 months, 18 months, 3 years and 7 years.

| Maternal score                                                                        | 6-months score                                                                | 18-months score                                                               | 3-years score                                                                   | 7-years score                                                                     |
|---------------------------------------------------------------------------------------|-------------------------------------------------------------------------------|-------------------------------------------------------------------------------|---------------------------------------------------------------------------------|-----------------------------------------------------------------------------------|
| <b>Scoring range:</b> 0-10<br><b>Categories:</b> Low 0-3, medium 4-5, high 6-10       | <b>Scoring range:</b> 0-6<br><b>Categories:</b> Low 0-2, medium 3-4, high 5-6 | <b>Scoring range:</b> 0-9<br><b>Categories:</b> Low 0-3, medium 4-5, high 6-9 | <b>Scoring range:</b> 0-6<br><b>Categories:</b> Low 0-1, medium 2-3, high 4-6   | <b>Scoring range:</b> 0-9<br><b>Categories:</b> Low 0-3, medium 4-5, high 6-9     |
| <b>1) Meal pattern:</b><br>breakfast, lunch, dinner and evening meal.                 | <b>1) Consuming more HM fruit puree</b><br>relative to CP fruit puree         | <b>1) Fruits:</b><br>eating fruits more than 10.5 t/week                      | <b>1) Fruits:</b><br>eating fruits more than 7 t/week                           | <b>1) Local fruits:</b><br>eating apple, pear and grapes more than 3.5 t/week     |
| <b>2) Nordic fruits:</b><br>apples, pears, plums and strawberries.                    | <b>2) Consuming more HM dinners</b><br>relative to CP dinners                 | <b>2) Vegetables:</b><br>eating vegetables more than 5.5 t/week               | <b>2) Vegetables:</b><br>eating vegetables more than 5 t/week                   | <b>2) Root vegetables:</b><br>eating carrots more than 1.5 t/week                 |
| <b>3) Root vegetables:</b><br>carrots, rutabaga and various types of onions.          | <b>3) Consuming more HM porridge</b><br>over CP porridge                      | <b>3) Peas and beans:</b><br>eating peas and beans more than 5 t/week         | <b>3) Potatoes:</b><br>eating more potatoes over rice and pasta.                | <b>3) Cabbages:</b><br>eating kale, cauliflower and broccoli more than 1.5 t/week |
| <b>4) Cabbages:</b><br>kale, cauliflower, broccoli and Brussels sprouts.              | <b>4) Being exclusively breast-fed</b> for at least 4 months (yes/no)         | <b>4) Potatoes:</b><br>eating more potatoes over rice and pasta.              | <b>4) Fish:</b><br>eating fish more than 2.12 t/week                            | <b>4) Potatoes:</b><br>eating more potatoes over rice and pasta.                  |
| <b>5) Potatoes:</b><br>eating more potatoes over rice and pasta                       | <b>5) Any breastfeeding</b> at 6 months (yes/no)                              | <b>5) Eating more HM porridge/baby cereal</b><br>over CP porridge/baby cereal | <b>5) Milk:</b><br>drinking more milk over fruit juice                          | <b>5) Whole grain bread:</b><br>reporting no consumption of white bread           |
| <b>6) Whole grain breads:</b><br>eating more whole grain breads over refined breads   | <b>6) Drinking more water</b><br>over sweetened beverages                     | <b>6) Fish:</b><br>eating fish more than 2.13 t/week                          | <b>6) Sweet beverages:</b><br>drinking sweetened beverages less than 2.5 t/week | <b>6) Oatmeal:</b><br>eating muesli or oatmeal more than 1.5 t/week               |
| <b>7) Oatmeal porridge:</b><br>frequency of eating oatmeal porridge                   |                                                                               | <b>7) Milk:</b><br>drinking more milk over fruit juice                        |                                                                                 | <b>7) Fish:</b><br>eating fish more than twice a week                             |
| <b>8) Foods from the wild countryside:</b><br>game, fish, seafood and native berries. |                                                                               | <b>8) Water:</b><br>drinking more water over sweetened beverages              |                                                                                 | <b>8) Milk:</b><br>drinking more milk over fruit juice                            |
| <b>9) Milk:</b><br>drinking more milk over fruit juice                                |                                                                               | <b>9) Eating more HM dinners</b><br>over CP baby food                         |                                                                                 | <b>9) Water:</b><br>drinking more water over sweetened beverages                  |
| <b>10) Water:</b><br>drinking more water over sweetened beverages                     |                                                                               |                                                                               |                                                                                 |                                                                                   |

Abbreviations: HM= homemade, CP= commercially prepared, t/week = times a week.

**Table S2.** The Norwegian Short Form of the Hierarchical Personality Inventory for Children. Scale of 5 choices (1- Not typical, 2- Not very typical, 3- Quite typical, 4 – Typical, 5- Very typical)

| <b>The Big Five personality Factors</b> | Question no and text from MoBa 8y questionnaire                  |
|-----------------------------------------|------------------------------------------------------------------|
| <b>Extraversion</b>                     |                                                                  |
|                                         | 8.Has energy to spare                                            |
|                                         | 10.Talks to people easily                                        |
|                                         | 18. Is chatty                                                    |
|                                         | 19. Enjoys life                                                  |
|                                         | 23. Has an infectious laugh                                      |
|                                         | 25. Talks about own feelings                                     |
| <b>Benevolence</b>                      |                                                                  |
|                                         | 4. Obeys without protests                                        |
|                                         | 5. Takes himself/herself into consideration first*               |
|                                         | 11. Does everything to get his/her own way*                      |
|                                         | 16. Imposes her or his will*                                     |
|                                         | 21. Is easily incensed by things*                                |
|                                         | 28. Doesn't envy others                                          |
| <b>Neuroticism</b>                      |                                                                  |
|                                         | 1.Is easily caught up in problems                                |
|                                         | 6. Is quick to worry about things                                |
|                                         | 14. Doubt himself/herself                                        |
|                                         | 17. Is readily discouraged by imminent failure                   |
|                                         | 22. Is quick to doubt his/her own capacities                     |
|                                         | 27. Has confidence in own abilities*                             |
| <b>Conscientiousness</b>                |                                                                  |
|                                         | 3. Makes an all-out effort                                       |
|                                         | 7. Forgets anything and everything*                              |
|                                         | 9. Prefers to leave work to others*                              |
|                                         | 13. Is not very thorough*                                        |
|                                         | 15. Finishes tasks to the very end                               |
|                                         | 26. Carries out work to the last detail                          |
| <b>Imagination</b>                      |                                                                  |
|                                         | 2. Has a broad range of interests                                |
|                                         | 12. Derives pleasure from creating things                        |
|                                         | 24. Has a rich imagination                                       |
|                                         | 20. Is quick to understands things                               |
|                                         | 29. Is interested in all that is new (is interested in anything) |
|                                         | 30. Can express himself/herself well                             |

\*Indicate that in this question the original scale has been reversed to comply with the total scale.

**Table S3.** Maternal characteristics according to NND adherence during pregnancy for participants answering the 8 year questionnaire.

|                          | Study population | Maternal pregnancy NND score |              |              |
|--------------------------|------------------|------------------------------|--------------|--------------|
| Maternal age at delivery | n(%)             | Low n(%)                     | Medium n(%)  | High n(%)    |
| <25y                     | 3,189(7.9)       | 1,160(11.6)                  | 1,134(8.0)   | 895(5.4)     |
| 25-29y                   | 13,004(32.1)     | 3,623(36.3)                  | 4,634(32.8)  | 4,747(28.9)  |
| 30-34y                   | 16,590(40.9)     | 3,748(37.5)                  | 5,821(41.2)  | 7,021(42.7)  |
| 35y+                     | 7,783(19.1)      | 1,460(14.6)                  | 2,535(18.0)  | 3,788(23.0)  |
| Prepregnancy BMI         |                  |                              |              |              |
| <18,5                    | 1,099(2.7)       | 291(2.9)                     | 394(2.8)     | 414(2.5)     |
| 18,5-24,9                | 26,838(66.2)     | 6,182(61.9)                  | 9,340(66.1)  | 11,316(68.8) |
| 25-29,9                  | 8,457(20.9)      | 2,304(23.1)                  | 2,881(20.4)  | 3,272(19.9)  |
| 30+                      | 3,298(8.1)       | 985(9.8)                     | 1,229(8.7)   | 1,084(6.6)   |
| Missing                  | 874(2.1)         | 229(2.3)                     | 280(2.0)     | 365(2.2)     |
| Maternal education       |                  |                              |              |              |
| =<12 y                   | 9,828(24.2)      | 2,922(29.3)                  | 3,455(24.5)  | 3,451(21.0)  |
| 13-16 y                  | 18,262(45.0)     | 4,394(44.0)                  | 6,362(45.0)  | 7,506(45.6)  |
| 17+ y                    | 11,722(28.9)     | 2,479(24.7)                  | 4,031(28.5)  | 5,221(31.7)  |
| missing                  | 754(1.9)         | 205(2.0)                     | 276(2.0)     | 273(1.7)     |
| Parity                   |                  |                              |              |              |
| primiparous              | 18,543(45.7)     | 5,230(52.4)                  | 6,759(47.9)  | 6,554(39.8)  |
| multiparous              | 22,023(54.3)     | 4,761(47.6)                  | 7,365(52.1)  | 9,897(60.2)  |
| Smoking during pregnancy |                  |                              |              |              |
| no smoking               | 38,082(93.9)     | 9,202(92.1)                  | 13,240(93.7) | 15,640(95.1) |
| smoking                  | 2,244(5.5)       | 730(7.3)                     | 812(5.8)     | 702(4.3)     |
| missing                  | 240(0.6)         | 59(0.6)                      | 72(0.5)      | 109(0.6)     |
| Breastfeeding            |                  |                              |              |              |
| yes                      | 38,747(95.5)     | 9,499(95.1)                  | 13,499(95.6) | 15,749(95.7) |
| no                       | 1,819(4.5)       | 492(4.9)                     | 625(4.4)     | 702(4.3)     |
| Civil status             |                  |                              |              |              |
| married/cohabitant       |                  |                              |              |              |
| yes                      | 39,379(97.1)     | 9,646(96.6)                  | 13,708(97.1) | 16,025(97.4) |
| no                       | 1,007(2.5)       | 302(3.0)                     | 358(2.5)     | 347(2.1)     |
| missing                  | 180 (80.4)       | 43(0.4)                      | 48(0.4)      | 79(0.5)      |
